# Supplementary material for: Protocol of a retrospective, multicentre observational study on hyperthermic intrathoracic chemotherapy in Germany
Source: PubMed Central journal article supplement — BMJ Open. 2020 Jul 20;10(7):e041511. doi: 10.1136/bmjopen-2020-041511 (PMC7375498; doi:10.1136/bmjopen-2020-041511), 2020-07-20
Supplement: bmjopen-2020-041511.draft_revisions.pdf [file bmjopen-2020-041511.draft_revisions.pdf]

# BMJ Open

BMJ Open is committed to open peer review. As part of this commitment we make the peer review history of every article we publish publicly available.

When an article is published we post the peer reviewers' comments and the authors' responses online. We also post the versions of the paper that were used during peer review. These are the versions that the peer review comments apply to.

The versions of the paper that follow are the versions that were submitted during the peer review process. They are not the versions of record or the final published versions. They should not be cited or distributed as the published version of this manuscript.

BMJ Open is an open access journal and the full, final, typeset and author-corrected version of record of the manuscript is available on our site with no access controls, subscription charges or pay-per-view fees (<http://bmjopen.bmj.com>).

If you have any questions on BMJ Open's open peer review process please email [info.bmjopen@bmj.com](mailto:info.bmjopen@bmj.com)

# BMJ Open

## Protocol of a retrospective, multicenter observational study on hyperthermic intrathoracic chemotherapy in Germany

|                               |                                                                                                                                                                                                                                                                                                                                                                                                                                                                                                   |
|-------------------------------|---------------------------------------------------------------------------------------------------------------------------------------------------------------------------------------------------------------------------------------------------------------------------------------------------------------------------------------------------------------------------------------------------------------------------------------------------------------------------------------------------|
| Journal:                      | <i>BMJ Open</i>                                                                                                                                                                                                                                                                                                                                                                                                                                                                                   |
| Manuscript ID                 | bmjopen-2020-041511                                                                                                                                                                                                                                                                                                                                                                                                                                                                               |
| Article Type:                 | Protocol                                                                                                                                                                                                                                                                                                                                                                                                                                                                                          |
| Date Submitted by the Author: | 10-Jun-2020                                                                                                                                                                                                                                                                                                                                                                                                                                                                                       |
| Complete List of Authors:     | Markowiak, Till; Universitätsklinikum Regensburg, Thoracic Surgery<br>Koller, Michael; Universitätsklinikum Regensburg, Center for Clinical Studies<br>Zeman , Florian; Universitätsklinikum Regensburg, Center for Clinical Studies<br>Huppertz, Gunnar; Universitätsklinikum Regensburg, Center for Clinical Studies<br>Hofmann, Hans-Stefan; Universitätsklinikum Regensburg, Department of Thoracic Surgery<br>Ried, Michael; Universitätsklinikum Regensburg, Department of Thoracic Surgery |
| Keywords:                     | Thoracic surgery < SURGERY, THORACIC MEDICINE, Adult oncology < ONCOLOGY                                                                                                                                                                                                                                                                                                                                                                                                                          |
|                               |                                                                                                                                                                                                                                                                                                                                                                                                                                                                                                   |

SCHOLARONE™  
Manuscripts

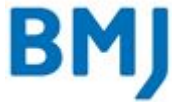

I, the Submitting Author has the right to grant and does grant on behalf of all authors of the Work (as defined in the below author licence), an exclusive licence and/or a non-exclusive licence for contributions from authors who are: i) UK Crown employees; ii) where BMJ has agreed a CC-BY licence shall apply, and/or iii) in accordance with the terms applicable for US Federal Government officers or employees acting as part of their official duties; on a worldwide, perpetual, irrevocable, royalty-free basis to BMJ Publishing Group Ltd ("BMJ") its licensees and where the relevant Journal is co-owned by BMJ to the co-owners of the Journal, to publish the Work in this journal and any other BMJ products and to exploit all rights, as set out in our [licence](#).

The Submitting Author accepts and understands that any supply made under these terms is made by BMJ to the Submitting Author unless you are acting as an employee on behalf of your employer or a postgraduate student of an affiliated institution which is paying any applicable article publishing charge ("APC") for Open Access articles. Where the Submitting Author wishes to make the Work available on an Open Access basis (and intends to pay the relevant APC), the terms of reuse of such Open Access shall be governed by a Creative Commons licence – details of these licences and which [Creative Commons](#) licence will apply to this Work are set out in our licence referred to above.

Other than as permitted in any relevant BMJ Author's Self Archiving Policies, I confirm this Work has not been accepted for publication elsewhere, is not being considered for publication elsewhere and does not duplicate material already published. I confirm all authors consent to publication of this Work and authorise the granting of this licence.

1  
2  
3 **Protocol of a retrospective, multicenter observational study on hyperthermic**  
4 **intrathoracic chemotherapy in Germany**  
5  
6  
7

8  
9 Till Markowiak<sup>1</sup>, Michael Koller<sup>2</sup>, Florian Zeman<sup>2</sup>, Gunnar Huppertz<sup>2</sup>, Hans-Stefan Hofmann<sup>1</sup>,  
10 Michael Ried<sup>1</sup> for the HITOC Study Group\*  
11  
12

13  
14  
15 \* Hauke Winter<sup>3</sup>, Martin Eichhorn<sup>3</sup>, Laura Klotz<sup>3</sup>, Rudolf Hatz<sup>4</sup>, Julia Zimmermann<sup>4</sup>, Julia  
16 Kovacs<sup>4</sup>, Bernward Passlick<sup>5</sup>, Severin Schmid<sup>5</sup>, Mohamed Hassan<sup>5</sup>  
17  
18

19  
20  
21  
22 <sup>1</sup> Department of Thoracic Surgery, University Hospital Regensburg, Regensburg, Germany  
23

24 <sup>2</sup> Center for Clinical Studies, University Hospital Regensburg, Regensburg, Germany  
25

26 <sup>3</sup> Thoracic Clinic Heidelberg of the University of Heidelberg, Heidelberg, Germany  
27

28 <sup>4</sup> Center for Thoracic Surgery of the Hospital University of Munich, Ludwig-Maximilians-  
29 University, Campus Großhadern; Asklepios Lung Clinic Gauting, Munich, Germany  
30

31 <sup>5</sup> Department of Thoracic Surgery, University Hospital Freiburg, Freiburg, Germany  
32  
33

34  
35  
36  
37  
38 **Words: 2249**  
39  
40

41  
42  
43  
44 **Address for correspondence:**  
45

46 Michael Ried; Department of Thoracic Surgery, University Hospital Regensburg, Franz-Josef-  
47 Strauß-Allee 11, D-93053 Regensburg, Germany  
48

49 Phone: +49 941 944 9810, Fax: +49 941 944 9811  
50

51 Email: [michael.ried@ukr.de](mailto:michael.ried@ukr.de)  
52  
53  
54  
55  
56  
57  
58  
59  
60

**ABSTRACT**

**Introduction:** Objective of the “German HITOC-study” is to evaluate the hyperthermic intrathoracic chemotherapy (HITOC) as additional treatment after surgical cytoreduction for malignant pleural tumors. Even though HITOC is applied with increasing frequency, there is no standardized therapy protocol concerning the technique of HITOC, the selection as well as dosage of chemotherapeutic agents and perioperative management in order to provide a safe and comparable, standardized treatment regime.

**Methods and analysis:** This trial is a retrospective, multi-center observational study, which is funded by the German Research Foundation. Approximately 300 patients will be included. Four Departments of Thoracic Surgery, who are performing the most HITOC procedures in Germany, are contributing to this study: Center for Thoracic Surgery at the University Hospital Regensburg, Thoracic Clinic Heidelberg of the University of Heidelberg, Center for Thoracic Surgery of the Hospital University of Munich and the Department of Thoracic Surgery at the University Hospital Freiburg. All patients who underwent surgical cytoreduction and subsequent HITOC at one of the four centers between starting the HITOC-program in 2008 until December 2019 will be included. Information on the performed HITOC will be obtained, focusing on the technique as well as the applied perfusion solution including the chemotherapeutic agent. Furthermore, parameters of the patient’s postoperative recovery will be analyzed to determine 30-day morbidity and mortality.

**Ethics and dissemination:** The approvals by the local ethics committee of the respective clinic and the three participating clinics have been obtained. The results will be presented in conferences and published in a peer-reviewed journal.

**Registration:** German Clinical Trials Register (DRKS-ID: DRKS00015012)

**Keywords:** HITOC, hyperthermic intrathoracic chemotherapy, chemotherapy perfusion, pleural malignancy, pleural mesothelioma

## ARTICLE SUMMARY

### Strengths and limitations of this study

- The results of this retrospective, multi-center study should allow a better standardization of the HITOC-procedure including perioperative safety measures and also validate the existing clinical experience.
- In the long term it could be the basis for survival analyses and further prospective studies.
- Due to the retrospective nature of our study, the implementation of hyperthermic intrathoracic chemotherapy was not uniform, which affects the analysis of 30-day morbidity and mortality
- To the best of our knowledge, this study will represent the largest cohort of patients with surgical cytoreduction and HITOC.

1  
2  
3 **Abbreviations and acronyms**  
4

5 BSA = body surface area  
6

7 eP/D = extended pleurectomy/decortication  
8

9 EPP = extrapleural pneumonectomy  
10

11 HITOC = hyperthermic intrathoracic chemotherapy  
12

13 MPM = malignant pleural mesothelioma  
14

15 P/D = pleurectomy/decortication  
16

17 TC= thymic carcinoma  
18

19 ZKS = Center for Clinical Studies of the University Medical Center Regensburg  
20  
21  
22  
23  
24  
25  
26  
27  
28  
29  
30  
31  
32  
33  
34  
35  
36  
37  
38  
39  
40  
41  
42  
43  
44  
45  
46  
47  
48  
49  
50  
51  
52  
53  
54  
55  
56  
57  
58  
59  
60

## INTRODUCTION

Hyperthermic intrathoracic chemotherapy (HITOC) is a local, intraoperative perfusion of the thoracic cavity with a chemotherapeutic agent after surgical cytoreduction of malignant pleural tumors. The HITOC represents an additional therapeutic option in a multimodality treatment concept especially for patients with malignant pleural mesothelioma (MPM), thymic tumors with pleural spread (stage IVa) and even in highly selected patients with pleural carcinosis (1, 2). The spreading growth pattern of these malignant tumors along the pleura impairs a microscopically complete resection and small residues of the tumor often lead to local recurrence (2). With the application of the HITOC after macroscopic complete pleural tumor resection it is expected to obtain better local tumor control and thereby improve progression-free as well as overall survival (2-4). The few existing case series or single-center retrospective studies in patients with MPM and thymic tumors have shown some encouraging results in this regard (2, 5-9). However, a prospective study showing an advantage in survival does not yet exist.

A survey of the German Society for Thoracic Surgery on the application of HITOC confirmed that approximately 350 HITOC procedures have already been performed in Germany from 2008 to 2017. Most of the procedures were conducted at University Thoracic Surgery Centers in Munich, Heidelberg, Freiburg, Regensburg and Cologne (Witten-Herdecke) (10).

Although HITOC is performed routinely in some experienced Departments of Thoracic Surgery in Germany, only feasibility studies, case series, and retrospective studies with small numbers of patients have been published so far evaluating perioperative management, technique, the selection and dosage of chemotherapeutic agents and postoperative complications (Table 1) (1, 11, 12). There is no standardized procedure of HITOC concerning the administration of chemotherapeutic agents, the dosage of the drugs, duration and temperature of the perfusion as well as the perioperative management of these patients including safety measures for the personal. As a result, clinics performing HITOC follow internationally reported experiences and developed individual protocols (10). In 2019 a clinical practice guideline on HITOC within the guideline system of the Association of the Scientific Medical Societies in Germany was



1  
2  
3 published. Due to the lack of empirical data, this guideline was based on an expert consensus  
4 (so called S1-guideline). The group of experts agreed on the key aspects of applying HITOC  
5 in thoracic surgery (Table 2) (13).  
6  
7

8  
9 Before performing the HITOC, all patients underwent surgical cytoreduction of the pleural  
10 tumor. Therefore, pleurectomy/decortication (P/D), extended pleurectomy/decortication (eP/D)  
11 with partial and/or complete resection of the pericardium and/or diaphragm, or extrapleural  
12 pneumonectomy (EPP) is carried out to achieve a macroscopic complete resection whenever  
13 possible (14). The outcome of lung-saving procedures (P/D, eP/D) turned out to be equivalent  
14 to EPP with significantly less complications, so that these procedures should preferably be  
15 performed (8).  
16  
17

18 Usually HITOC and tumor resection are performed in the same session. Apical inflow and  
19 basal outflow drainages are placed in the thoracic cavity. The following perfusion can be  
20 carried out with an open (before wound closure) or closed (after wound closure) chest, while  
21 the procedure on the closed chest is more common. Its advantage is that no cytostatic agent  
22 can leak out of the thoracic cavity during circulation, which would be a safety risk for the  
23 practitioner (7, 10). The drainages are then connected to an external perfusion system. A  
24 stable circulation is established with a priming-volume and the perfusion solution is heated to  
25 a targeted temperature of 40-43°C (9, 15). The chemotherapeutic agents are added to the  
26 perfusate and the circulation is performed between 60 and 120 minutes. Subsequently, the  
27 perfusion solution is passively drained.  
28  
29  
30  
31  
32  
33  
34  
35  
36  
37  
38  
39  
40  
41  
42  
43  
44

45 This retrospective, multi-center study will provide the first time opportunity to enroll a  
46 substantial number of study participants from experienced German centers regarding HITOC  
47 to validate the clinical experience of the individual centers and possibly form the basis for a  
48 standardized procedure with an adequate perioperative management in patients who  
49 underwent HITOC. In the long term, this database might be used for survival analyses with  
50 respect to the different tumor entities and may serve to design a prospective study.  
51  
52  
53  
54  
55  
56  
57  
58  
59  
60

## METHODS AND ANALYSIS

### Study design

This is a retrospective, multi-center observational study to evaluate HITOC at university thoracic surgery clinics with the most performed operations including HITOC in Germany. The participating clinics include the Thoracic Surgery Center Regensburg (University Hospital Regensburg, Hospital Barmherzige Brüder Regensburg), the Department of Thoracic Surgery, Thoracic Clinic Heidelberg (University of Heidelberg), the Department of Thoracic Surgery, Medical Center, University of Freiburg and the Thoracic Surgery Center Munich, Hospital of the University of Munich (Ludwig-Maximilians-University, Campus Großhadern; Asklepios Lung Clinic Gauting). Estimating the number of patients of each participating clinic at the time of designing this study resulted in a total number of approximately 250-300 patients in the period between January 2008 and December 2019 who could be retrospectively included in this study. This will represent the largest cohort of patients who received HITOC compared to the recent international literature (Table 1) (9).

### Inclusion and exclusion criteria

The study will examine patients with malignant pleural tumors who received HITOC after surgical cytoreduction between beginning of the HITOC program in 2008 and the end of December 2019 at all study centers. Patients without HITOC or without surgical cytoreduction will not be included (Table 3). Informed consent is not an eligibility criterion because data will be processed in a pseudonymized manner in accordance with EU-GDPR and BayKrG.

### Study endpoints

This study aims at quality assurance and evaluation of HITOC after surgical cytoreduction at the thoracic surgical university hospitals with most experience with HITOC in Germany. For this broad assessment, a compound of endpoints was defined as shown in Table 4.

Central element of the study will be the evaluation of parameters concerning the implementation of HITOC. In particular the selection of chemotherapeutic agents by the

1  
2  
3 respective clinics will be assessed by showing which and how often certain combinations and  
4 dosages were used at leading German clinics in this field, since the approach varies  
5 internationally (Table 1). In this regard, the association of the administered cisplatin dosage  
6 with the occurrence and severity (according to the FDIGO classification) of postoperative renal  
7 insufficiency will be analyzed. Also the incidence and severity (according to the Clavien-Dindo  
8 classification) as well as the spectrum of postoperative complications after HITOC will be  
9 determined. To further evaluate the safety of the procedure, 30-day mortality will be another  
10 element of the assessment. Finally, the development of this procedure in Germany concerning  
11 the technique, perioperative management and safety over a time span of approximately eleven  
12 years will be demonstrated (Figure 1).  
13  
14  
15  
16  
17  
18  
19  
20  
21  
22  
23  
24  
25

### 26 **Documentation and data base**

27  
28 After identifying all patients who meet all criteria shown in Table 3, data will be documented in  
29 an electronic database. In this database information on the performed surgery and additional  
30 HITOC will be obtained, focusing on the technique as well as the applied perfusion solution.  
31  
32 Therefore, participating clinics will enter parameters regarding the patient characteristics (age,  
33 ECOG stage, ASA stage, tumor entity, tumor stage, date of first diagnosis), performed surgery  
34 (localization, extend of surgical cytoreduction, complications), HITOC (combination and  
35 dosage of chemotherapeutics, perfusion volume, temperature, flow rate, duration of  
36 chemotherapy perfusion, complications) and perioperative management (weaning, fluid  
37 balancing, care on the intensive care unit). Data from the postoperative period (30-day  
38 morbidity) also include complications assigned to the Clavien-Dindo classification with special  
39 respect to postoperative renal insufficiency, required surgical revisions, duration of intensive  
40 medical care, hospitalization and 30-day mortality (16). In addition, first data regarding  
41 progression-free and overall survival are warranted to be analyzed (Table 5).  
42  
43  
44  
45  
46  
47  
48  
49  
50  
51  
52  
53  
54  
55  
56  
57

### 58 **Data management**

59  
60

1  
2  
3 The Center for Clinical Studies (ZKS) of the University Medical Center Regensburg is  
4 establishing a web-based, central and uniform database, using a common Clinical Database  
5 Management System (CDMS). This system provides the capability to perform major data  
6 management activities within a consistent, auditable, integrated and EU-GDPR compliant  
7 environment. Data quality checks (regarding data ranges, validity and consistency) will be  
8 carried out regularly. In case of necessary corrections or existing data inconsistencies, a data  
9 manager will generate data queries consecutively. All data entries will be routinely recorded  
10 via audit trail, as well as data modifications and data corrections.  
11  
12  
13  
14  
15  
16  
17  
18  
19  
20  
21

### 22 **Statistical analyses**

23  
24 Subsequently, the statistical data evaluation of the study is also carried out by the ZKS of the  
25 University Hospital Regensburg.  
26

27 Patient characteristics, quality assurance parameters and evaluation of HITOC after surgical  
28 cytoreduction (Table 4) will be summarized descriptively, using absolute and relative  
29 frequencies for categorical data and mean, standard deviation, median, interquartile range,  
30 minimum and maximum for metric data.  
31  
32  
33  
34  
35

36 Risk factors (e.g. HITOC parameters) for 30-day mortality, in-hospital mortality and  
37 postoperative complications will be assessed by using binary logistic regression models. With  
38 regard to all outcome measurements, reference values for optimal HITOC parameters will be  
39 provided. The level of significance will be set at 5% for all statistical tests.  
40  
41  
42  
43  
44

45 The results of this retrospective study are intended to contribute to a standardization of the  
46 perioperative procedure including safety measurements. To establish quality assurance in  
47 HITOC patients, benchmarks are to be defined on the basis of the study. The rate of lung-  
48 sparing resections as well as the rate of postoperative renal insufficiency, wound infections as  
49 well as the length of hospital stay after surgical cytoreduction including HITOC and the 30-day  
50 mortality will be determined and thus provide reference for clinics performing this combined  
51 procedure.  
52  
53  
54  
55  
56  
57  
58  
59  
60

### **Ethics and dissemination**

The study was funded by the German Research Foundation (Deutsche Forschungsgemeinschaft – DFG; GZ: RI 2905/3-1) and will be supported for 12 months after its start in January 2020. The trial is registered in the German Register of Clinical Studies (DRKS-ID: DRKS00015012, Date of registration: 03th August 2018). The approvals by the local ethics committee of the respective clinic and the three participating clinics have been obtained (reference number University Regensburg: 18-1119-104). Each patient will be assigned an identification number for pseudonymization. The study ends regularly in December 2020 when the study parameters have been evaluated and published. The results are planned to be published in a peer-reviewed journal.

### **Patient and public involvement**

In this study, patients or the public were not involved in the design, conduct, reporting or dissemination of research.

## **DISCUSSION**

There are different approaches in the international literature regarding the implementation and perioperative management of HITOC after surgical cytoreduction (9). A common standard for the procedure of HITOC does not yet exist, so that clinics performing this procedure orientate their protocols towards a small number of studies with often few participants (Table 1).

The available single-center studies demonstrated that the rate of complications could be acceptable with an appropriate perioperative management (1, 11, 12). To perform HITOC safely and keep HITOC-specific complications low, adequate perioperative management and an interdisciplinary approach is essential, especially between surgery, anesthesia and intensive care (17).

In the published research, cisplatin is always part of the perfusion solution. However, the dose administered varies, but usually it is applied in doses lower than 175 mg/m<sup>2</sup> body surface area BSA; Table 1) (1, 10, 18-20). The application of higher doses of cisplatin seems to be

1  
2  
3 associated with better overall survival, but also might cause more complications. Our study  
4 group described that the cisplatin concentration in patient serum increases to only about 2%  
5 of the intrathoracic concentration, although if the cisplatin dosage is increased up to 150 mg/m<sup>2</sup>  
6 BSA (6, 21). As a result, much higher concentrations can be achieved locally in the tissue than  
7 with systemic administration (15). However, high intrathoracic concentrations lead to an  
8 increased incidence of postoperative complications (e.g. renal insufficiency), for which reason  
9 the maximum tolerable dose of cisplatin was identified at 225 mg/m<sup>2</sup> BSA (6). Concerning  
10 postoperative renal insufficiency, the use of protective measures such as nephroprotective  
11 agents and fluid balancing may have a preventive effect (22). First introduced by Sugarbaker  
12 et al. in HITOC, it is currently also being practiced in a few more studies (6, 22).

13  
14 The application of a second chemotherapeutic agent is also heterogeneous. The  
15 considerations of applied agents were guided by the experience in systemic therapy.  
16 Superiority over systemic cisplatin monotherapy has been demonstrated in both MPM and  
17 thymoma patients (23, 24). In some clinics, cisplatin is combined with doxorubicin, epirubicin,  
18 gemcitabine or mitomycin, whereas other clinics use cisplatin alone (5, 18, 25).

19  
20 Another factor where the protocols differ in international compare is the target temperature of  
21 the chemotherapeutic solution. During perfusion, it is constantly measured using two probes  
22 at the inflow and outflow drainage (6). It has been shown that the penetration depth of cisplatin  
23 into the tissue increases with the temperature of the intrathoracic solution. Applied  
24 temperatures of 40-43°C are described in the literature (1, 26-28). Intrapleural temperatures  
25 above 43°C are supposed with an increased risk of pulmonary edema and should therefore  
26 be avoided (29). Also, high temperatures of the perfusate lead to an increased risk of systemic  
27 hyperthermia (17). Regarding the optimal duration of perfusion only little research exists and  
28 thus varies between 60 and 120 minutes (19, 25).

## 29 30 31 32 33 34 35 36 37 38 39 40 41 42 43 44 45 46 47 48 49 50 51 52 53 54 55 56 **Conclusion**

57 In summary, the German HITOC-Study will include the biggest study population with surgical  
58 cytoreduction and HITOC since now. It will retrospectively evaluate the additional HITOC-  
59  
60

1  
2  
3 procedure with main respect to quality assurance and it will support a standardization of the  
4  
5 procedure. Results are expected in 2021.  
6  
7  
8

9 **Trial status:**

10  
11 At the time of manuscript submission, data base is finished and data collection started in April  
12  
13 2020. The following analyses are planned to be completed by the end of 2020.  
14  
15  
16

17 **Declarations**

18  
19 Author contributions: TM and MR wrote the manuscript. FZ, GH and MK proved the manuscript  
20  
21 regarding the study design and the described statistical analysis. HSH and all collaborators  
22  
23 revised the manuscript critically. All authors approved the final version of the manuscript.  
24  
25  
26

27  
28 Funding statement: This work was supported by the German Research Foundation,  
29  
30 Kennedyallee 40, 53170, Bonn, Germany [Grant number GZ: RI 2905/3-1].  
31  
32  
33

34 Competing interests: Nothing to declare.  
35  
36  
37  
38  
39  
40  
41  
42  
43  
44  
45  
46  
47  
48  
49  
50  
51  
52  
53  
54  
55  
56  
57  
58  
59  
60

**FIGURE LEGENDS****Figure 1:** Flow-chart of the study design

For peer review only



## TABLES

**Table 1:** Study overview

| Author, year<br>(reference number) | Patients<br>(primary tumors)   | Chemotherapeutic agents, duration,<br>temperature                                                              |
|------------------------------------|--------------------------------|----------------------------------------------------------------------------------------------------------------|
| Refaely et al., 2001 (18)          | n=15<br>(thymoma/TC)           | cisplatin (100mg/m <sup>2</sup> BSA); 60 min; 42°C                                                             |
| De Bree et al., 2002 (5)           | n=3 (thymoma/TC)<br>n=11 (MPM) | cisplatin (80mg/m <sup>2</sup> BSA) + doxorubicin<br>(15-30mg/m <sup>2</sup> BSA); 90 min; 40-41°C             |
| Richards et al., 2006 (6)          | n=44 (MPM)                     | cisplatin (low-dose: 50-150mg/m <sup>2</sup> BSA;<br>high-dose: 175-250mg/m <sup>2</sup> BSA); 60 min;<br>42°C |
| Zellos et al., 2009 (11)           | n=29 (MPM)                     | cisplatin (75-200mg/m <sup>2</sup> BSA); 60 min;<br>42°C                                                       |
| Tillemann et al., 2009 (12)        | n=92 (MPM)                     | cisplatin (225mg/m <sup>2</sup> BSA); 60 min; 42°C                                                             |
| Ried et al., 2013 (2)              | n=8 (MPM)<br>n=8 (thymoma/TC)  | cisplatin (100-150mg/m <sup>2</sup> BSA); 60 min;<br>42°C                                                      |
| Sugarbaker et al., 2013 (1)        | n=72 (MPM)                     | cisplatin (175-225mg/m <sup>2</sup> BSA); 60 min;<br>42°C                                                      |
| Yellin et al., 2013 (26)           | n=35<br>(thymoma/TC)           | cisplatin (100mg/m <sup>2</sup> BSA) + doxorubicin<br>(50-60mg, 60 min; 43°C                                   |
| Yu et al.; 2013 (19)               | n=4 (thymoma/TC)               | cisplatin (100mg/m <sup>2</sup> BSA); 120 min; 41-<br>43°C                                                     |
| Migliore et al., 2015 (4)          | n=6 (MPM)<br>n=2 (lung cancer) | cisplatin (120mg/m <sup>2</sup> BSA); 60 min;<br>42.5°C                                                        |
| Ishibashi et al., 2015 (28)        | n=14 (MPM)                     | cisplatin (80mg/m <sup>2</sup> BSA); 60 min; 42°C                                                              |
| Ambrogi et al., 2016 (20)          | n=13<br>(thymoma/TC)           | cisplatin (80mg/m <sup>2</sup> BSA) + doxorubicin<br>(25mg/m <sup>2</sup> BSA); 60 min; 42.5°C                 |
| Bertoglio et al., 2017 (30)        | n=26 (MPM)                     | cisplatin (80mg/m <sup>2</sup> BSA) + doxorubicin<br>(25mg/m <sup>2</sup> BSA); 60 min; 42.5°C                 |
| Maury et al., 2017 (25)            | n=19<br>(thymoma/TC)           | cisplatin (50mg/m <sup>2</sup> BSA) + mitomycin<br>(25mg/m <sup>2</sup> BSA); 90 min; 42°C                     |
| Ambrogi et al., 2018 (8)           | n=49 (MPM)                     | cisplatin (80mg/m <sup>2</sup> BSA) + epirubicin<br>(25mg/m <sup>2</sup> BSA); 60 min; 42.5°C                  |
| Burt et al., 2018 (7)              | n=104 (MPM)                    | cisplatin (175-225mg/m <sup>2</sup> BSA) +<br>gemcitabine (100-1200mg/m <sup>2</sup> BSA); 60<br>min; 40-42°C  |

|                            |                            |                      |                                                                                  |
|----------------------------|----------------------------|----------------------|----------------------------------------------------------------------------------|
| 1<br>2<br>3<br>4<br>5<br>6 | Markowiak et al., 2019 (3) | n=29<br>(thymoma/TC) | cisplatin (100-175mg/m <sup>2</sup> BSA) +<br>doxorubicin (0-65mg); 60 min; 42°C |
|----------------------------|----------------------------|----------------------|----------------------------------------------------------------------------------|

7 BSA = Body surface area, MPM = malignant pleural mesothelioma, TC= thymic carcinoma  
8  
9  
10  
11  
12  
13  
14  
15  
16  
17  
18  
19  
20  
21  
22  
23  
24  
25  
26  
27  
28  
29  
30  
31  
32  
33  
34  
35  
36  
37  
38  
39  
40  
41  
42  
43  
44  
45  
46  
47  
48  
49  
50  
51  
52  
53  
54  
55  
56  
57  
58  
59  
60

For peer review only

**Table 2:** Consensus-based expert recommendation (excerpt) (13)

| <b>Content; consensus strength</b> |                                                                                                       |
|------------------------------------|-------------------------------------------------------------------------------------------------------|
| <b>Nomenclature</b>                | – Hyperthermic intrathoracic chemotherapy (HITOC); 100%                                               |
| <b>Technique</b>                   | – One session; 100%                                                                                   |
|                                    | – Closed thorax; 100%                                                                                 |
|                                    | – Temperature of 42°C on the outflow drainage; 100%                                                   |
|                                    | – Duration of 60min; 100%                                                                             |
| <b>Chemotherapeutic agents</b>     | – Application of cisplatin; 100%                                                                      |
|                                    | – Maximum dosage of 225mg/m <sup>2</sup> BSA; 100%                                                    |
|                                    | – Dosage between 150 and 175mg/m <sup>2</sup> BSA; 100%                                               |
| <b>Perioperative management</b>    | – Perioperative fluid balancing and forced diuresis; 100%                                             |
|                                    | – Drug-based nephroprotection may be considered; 100%                                                 |
|                                    | – Safety-management including protective clothing of the personnel and disposal of drain fluids; 100% |
| <b>Indications</b>                 | – Malignant pleural mesothelioma; 100%                                                                |
|                                    | – Stage IVa thymoma; 100%                                                                             |
|                                    | – Secondary pleural carcinosis; 100%                                                                  |

BSA=Body surface area

**Table 3:** Inclusion- and exclusion criteria

| Inclusion criteria                                                                 | Exclusion criteria                                                                     |
|------------------------------------------------------------------------------------|----------------------------------------------------------------------------------------|
| <ul style="list-style-type: none"><li>• Age <math>\geq</math> 18 years</li></ul>   | <ul style="list-style-type: none"><li>• Treatment without HITOC</li></ul>              |
| <ul style="list-style-type: none"><li>• Malignant pleural tumor</li></ul>          | <ul style="list-style-type: none"><li>• HITOC without surgical cytoreduction</li></ul> |
| <ul style="list-style-type: none"><li>• Surgical cytoreduction and HITOC</li></ul> |                                                                                        |
| <ul style="list-style-type: none"><li>• Treatment period: 2008-2019</li></ul>      |                                                                                        |

HITOC=hyperthermic intrathoracic chemotherapy

**Table 4:** Study Endpoints (Quality assurance and implementation of intraoperative HITOC after surgical cytoreduction)

| Study endpoints                                                                                       |
|-------------------------------------------------------------------------------------------------------|
| • dosing of the intrathoracic chemotherapeutic agent                                                  |
| • postoperative renal failure (dependence on cisplatin dosage)                                        |
| • 30-day morbidity and mortality                                                                      |
| • development of the technique, perioperative management and complication spectrum over time of HITOC |

HITOC=hyperthermic intrathoracic chemotherapy

**Table 5:** Overview of data collection with respect to subgroups

**Subgroups of data collection**

- Demographic data
- Physical examination
- Performance status
- Tumor specific data
- Surgery specific data (intra-, postoperative)
- HITOC specific data
- Renal function
- Information on hospitalization
- Follow-up

HITOC=hyperthermic intrathoracic chemotherapy

**REFERENCES**

1. Sugarbaker DJ, Gill RR, Yeap BY, Wolf AS, DaSilva MC, Baldini EH, et al. Hyperthermic intraoperative pleural cisplatin chemotherapy extends interval to recurrence and survival among low-risk patients with malignant pleural mesothelioma undergoing surgical macroscopic complete resection. *J Thorac Cardiovasc Surg.* 2013;145(4):955-63.
2. Ried M, Potzger T, Braune N, Neu R, Zausig Y, Schalke B, et al. Cytoreductive surgery and hyperthermic intrathoracic chemotherapy perfusion for malignant pleural tumours: perioperative management and clinical experience. *Eur J Cardiothorac Surg.* 2013;43(4):801-7.
3. Markowiak T, Neu R, Ansari MKA, Grosser C, Klinkhammer-Schalke M, Hofmann HS, et al. Surgical Cytoreduction and HITOC for Thymic Malignancies with Pleural Dissemination. *Thorac Cardiovasc Surg.* 2019.
4. Migliore M, Calvo D, Criscione A, Viola C, Privitera G, Spatola C, et al. Cytoreductive surgery and hyperthermic intrapleural chemotherapy for malignant pleural diseases: preliminary experience. *Future Oncol.* 2015;11(2 Suppl):47-52.
5. de Bree E, van Ruth S, Baas P, Rutgers EJ, van Zandwijk N, Witkamp AJ, et al. Cytoreductive surgery and intraoperative hyperthermic intrathoracic chemotherapy in patients with malignant pleural mesothelioma or pleural metastases of thymoma. *Chest.* 2002;121(2):480-7.
6. Richards WG, Zellos L, Bueno R, Jaklitsch MT, Janne PA, Chirieac LR, et al. Phase I to II study of pleurectomy/decortication and intraoperative intracavitary hyperthermic cisplatin lavage for mesothelioma. *J Clin Oncol.* 2006;24(10):1561-7.
7. Burt BM, Richards WG, Lee HS, Bartel S, Dasilva MC, Gill RR, et al. A Phase I Trial of Surgical Resection and Intraoperative Hyperthermic Cisplatin and Gemcitabine for Pleural Mesothelioma. *J Thorac Oncol.* 2018;13(9):1400-9.
8. Ambrogi MC, Bertoglio P, Aprile V, Chella A, Korasidis S, Fontanini G, et al. Diaphragm and lung-preserving surgery with hyperthermic chemotherapy for malignant pleural mesothelioma: A 10-year experience. *J Thorac Cardiovasc Surg.* 2018;155(4):1857-66 e2.

- 1  
2  
3 9. Zhou H, Wu W, Tang X, Zhou J, Shen Y. Effect of hyperthermic intrathoracic  
4 chemotherapy (HITHOC) on the malignant pleural effusion: A systematic review and meta-  
5 analysis. *Medicine (Baltimore)*. 2017;96(1):e5532.  
6  
7
- 8  
9 10. Ried M, Hofmann HS, Dienemann H, Eichhorn M. [Implementation of Hyperthermic  
10 Intrathoracic Chemotherapy (HITHOC) in Germany]. *Zentralbl Chir*. 2018.  
11  
12
- 13 11. Zellos L, Richards WG, Capalbo L, Jaklitsch MT, Chirieac LR, Johnson BE, et al. A  
14 phase I study of extrapleural pneumonectomy and intracavitary intraoperative hyperthermic  
15 cisplatin with amifostine cytoprotection for malignant pleural mesothelioma. *J Thorac*  
16 *Cardiovasc Surg*. 2009;137(2):453-8.  
17  
18
- 19 12. Tilleman TR, Richards WG, Zellos L, Johnson BE, Jaklitsch MT, Mueller J, et al.  
20 Extrapleural pneumonectomy followed by intracavitary intraoperative hyperthermic cisplatin  
21 with pharmacologic cytoprotection for treatment of malignant pleural mesothelioma: a phase II  
22 prospective study. *J Thorac Cardiovasc Surg*. 2009;138(2):405-11.  
23  
24
- 25 13. Ried M, Eichhorn M, Winter H, Grützner U, Lindner M, Hatz RA, et al. [Expert  
26 Recommendation for the Implementation of Hyperthermic Intrathoracic Chemotherapy  
27 (HITOC) in Germany]. *Zentralbl Chir*. 2020;145(01):89-98.  
28  
29
- 30 14. Rusch V, Baldini EH, Bueno R, De Perrot M, Flores R, Hasegawa S, et al. The role of  
31 surgical cytoreduction in the treatment of malignant pleural mesothelioma: meeting summary  
32 of the International Mesothelioma Interest Group Congress, September 11-14, 2012, Boston,  
33 Mass. *J Thorac Cardiovasc Surg*. 2013;145(4):909-10.  
34  
35
- 36 15. Ried M, Lehle K, Neu R, Diez C, Bednarski P, Sziklavari Z, et al. Assessment of  
37 cisplatin concentration and depth of penetration in human lung tissue after hyperthermic  
38 exposure. *Eur J Cardiothorac Surg*. 2015;47(3):563-6.  
39  
40
- 41 16. Dindo D, Demartines N, Clavien PA. Classification of surgical complications: a new  
42 proposal with evaluation in a cohort of 6336 patients and results of a survey. *Ann Surg*.  
43 2004;240(2):205-13.  
44  
45  
46  
47  
48  
49  
50  
51  
52  
53  
54  
55  
56  
57  
58  
59  
60



- 1  
2  
3 17. Kerscher C, Ried M, Hofmann HS, Graf BM, Zausig YA. Anaesthetic management of  
4  
5  
6  
7  
8  
9  
10  
11  
12  
13  
14  
15  
16  
17  
18  
19  
20  
21  
22  
23  
24  
25  
26  
27  
28  
29  
30  
31  
32  
33  
34  
35  
36  
37  
38  
39  
40  
41  
42  
43  
44  
45  
46  
47  
48  
49  
50  
51  
52  
53  
54  
55  
56  
57  
58  
59  
60  
20. Ambrogi MC, Korasidis S, Lucchi M, Fanucchi O, Giarratana S, Melfi F, et al. Pleural  
recurrence of thymoma: surgical resection followed by hyperthermic intrathoracic perfusion  
chemotherapy. *Eur J Cardiothorac Surg*. 2016;49(1):321-6.
21. Ried M, Potzger T, Braune N, Diez C, Neu R, Sziklavari Z, et al. Local and systemic  
exposure of cisplatin during hyperthermic intrathoracic chemotherapy perfusion after  
pleurectomy and decortication for treatment of pleural malignancies. *J Surg Oncol*.  
2013;107(7):735-40.
22. Markowiak T, Kerner N, Neu R, Potzger T, Grosser C, Zeman F, et al. Adequate  
nephroprotection reduces renal complications after hyperthermic intrathoracic chemotherapy.  
*J Surg Oncol*. 2019;120(7):1220-6.
23. Ardizzoni A, Rosso R, Salvati F, Fusco V, Cinquegrana A, De Palma M, et al. Activity  
of doxorubicin and cisplatin combination chemotherapy in patients with diffuse malignant  
pleural mesothelioma. An Italian Lung Cancer Task Force (FONICAP) Phase II study. *Cancer*.  
1991;67(12):2984-7.
24. Schmitt J, Loehrer PJ, Sr. The role of chemotherapy in advanced thymoma. *J Thorac  
Oncol*. 2010;5(10 Suppl 4):S357-60.
25. Maury JM, Girard N, Tabutin M, Grima R, Chalabreysse L, Pavlakovic I, et al. Intra-  
Thoracic Chemo-Hyperthermia for pleural recurrence of thymoma. *Lung Cancer*. 2017;108:1-  
6.

- 1  
2  
3 26. Yellin A, Simansky DA, Ben-Avi R, Perelman M, Zeitlin N, Refaely Y, et al. Resection  
4 and heated pleural chemoperfusion in patients with thymic epithelial malignant disease and  
5 pleural spread: a single-institution experience. *J Thorac Cardiovasc Surg.* 2013;145(1):83-7;  
6 discussion 7-9.  
7  
8  
9  
10  
11 27. de Bree E, van Ruth S, Schotborgh CE, Baas P, Zoetmulder FA. Limited cardiotoxicity  
12 after extensive thoracic surgery and intraoperative hyperthermic intrathoracic chemotherapy  
13 with doxorubicin and cisplatin. *Ann Surg Oncol.* 2007;14(10):3019-26.  
14  
15  
16  
17 28. Ishibashi H, Kobayashi M, Takasaki C, Okubo K. Interim results of  
18 pleurectomy/decortication and intraoperative intrapleural hyperthermic cisplatin perfusion for  
19 patients with malignant pleural mesothelioma intolerable to extrapleural pneumonectomy. *Gen*  
20 *Thorac Cardiovasc Surg.* 2015;63(7):395-400.  
21  
22  
23  
24  
25  
26 29. Mustafa KY, Selig WM, Burhop KE, Minnear FL, Malik AB. Hyperthermia-induced  
27 pulmonary edema. *J Appl Physiol (1985).* 1986;60(6):1980-5.  
28  
29  
30 30. Bertoglio P, Ambrogi MC, Chella A, Aprile V, Dini P, Korasidis S, et al. Is less also  
31 better? A single-institution experience on treatment of early stage Malignant Pleural  
32 Mesothelioma. *Eur J Surg Oncol.* 2017;43(7):1365-71.  
33  
34  
35  
36  
37  
38  
39  
40  
41  
42  
43  
44  
45  
46  
47  
48  
49  
50  
51  
52  
53  
54  
55  
56  
57  
58  
59  
60

## Identification

Patients  $\geq 18$  years with malignant pleural tumor from 01/2008-12/2019 in one of the four participating centers

Patients without HITOC or cytoreduction

Eligible Patients

## Data acquisition

HITOC-specific

- Applied agents
- Dosage
- Volume

Laboratory findings

- Serum creatinine levels
- Required dialysis

Clinical findings

- Perioperative management
- Required surgical revisions
- Weaning
- Duration of intensive medical care etc.

## Evaluation

Dosing of intrathoracic chemotherapeutic agent

Postoperative renal failure

30-day mortality

Postoperative complications

Development of the technique, perioperative management and complication spectrum over time

**STROBE 2007 (v4) Statement—Checklist of items that should be included in reports of *cohort studies***

| Section/Topic                | Item # | Recommendation                                                                                                                                                                       | Reported on page # |
|------------------------------|--------|--------------------------------------------------------------------------------------------------------------------------------------------------------------------------------------|--------------------|
| <b>Title and abstract</b>    | 1      | (a) Indicate the study's design with a commonly used term in the title or the abstract                                                                                               | 1,2                |
|                              |        | (b) Provide in the abstract an informative and balanced summary of what was done and what was found                                                                                  | 2                  |
| <b>Introduction</b>          |        |                                                                                                                                                                                      |                    |
| Background/rationale         | 2      | Explain the scientific background and rationale for the investigation being reported                                                                                                 | 5,6                |
| Objectives                   | 3      | State specific objectives, including any prespecified hypotheses                                                                                                                     | 6                  |
| <b>Methods</b>               |        |                                                                                                                                                                                      |                    |
| Study design                 | 4      | Present key elements of study design early in the paper                                                                                                                              | 7                  |
| Setting                      | 5      | Describe the setting, locations, and relevant dates, including periods of recruitment, exposure, follow-up, and data collection                                                      | 7,8                |
| Participants                 | 6      | (a) Give the eligibility criteria, and the sources and methods of selection of participants. Describe methods of follow-up                                                           | 7                  |
|                              |        | (b) For matched studies, give matching criteria and number of exposed and unexposed                                                                                                  | -                  |
| Variables                    | 7      | Clearly define all outcomes, exposures, predictors, potential confounders, and effect modifiers. Give diagnostic criteria, if applicable                                             | 7,8                |
| Data sources/<br>measurement | 8*     | For each variable of interest, give sources of data and details of methods of assessment (measurement). Describe comparability of assessment methods if there is more than one group | 8,9                |
| Bias                         | 9      | Describe any efforts to address potential sources of bias                                                                                                                            | Not applicable     |
| Study size                   | 10     | Explain how the study size was arrived at                                                                                                                                            | (7)                |
| Quantitative variables       | 11     | Explain how quantitative variables were handled in the analyses. If applicable, describe which groupings were chosen and why                                                         | 9                  |
| Statistical methods          | 12     | (a) Describe all statistical methods, including those used to control for confounding                                                                                                | 9                  |
|                              |        | (b) Describe any methods used to examine subgroups and interactions                                                                                                                  | 9                  |
|                              |        | (c) Explain how missing data were addressed                                                                                                                                          | Not applicable     |
|                              |        | (d) If applicable, explain how loss to follow-up was addressed                                                                                                                       | Not applicable     |
|                              |        | (e) Describe any sensitivity analyses                                                                                                                                                | Not applicable     |
| <b>Results</b>               |        |                                                                                                                                                                                      |                    |

|                          |     |                                                                                                                                                                                                              |                |
|--------------------------|-----|--------------------------------------------------------------------------------------------------------------------------------------------------------------------------------------------------------------|----------------|
| Participants             | 13* | (a) Report numbers of individuals at each stage of study—eg numbers potentially eligible, examined for eligibility, confirmed eligible, included in the study, completing follow-up, and analysed            | Not applicable |
|                          |     | (b) Give reasons for non-participation at each stage                                                                                                                                                         | Not applicable |
|                          |     | (c) Consider use of a flow diagram                                                                                                                                                                           | Figure 1       |
| Descriptive data         | 14* | (a) Give characteristics of study participants (eg demographic, clinical, social) and information on exposures and potential confounders                                                                     | Not applicable |
|                          |     | (b) Indicate number of participants with missing data for each variable of interest                                                                                                                          | Not applicable |
|                          |     | (c) Summarise follow-up time (eg, average and total amount)                                                                                                                                                  | Not applicable |
| Outcome data             | 15* | Report numbers of outcome events or summary measures over time                                                                                                                                               | Not applicable |
| Main results             | 16  | (a) Give unadjusted estimates and, if applicable, confounder-adjusted estimates and their precision (eg, 95% confidence interval). Make clear which confounders were adjusted for and why they were included | Not applicable |
|                          |     | (b) Report category boundaries when continuous variables were categorized                                                                                                                                    | Not applicable |
|                          |     | (c) If relevant, consider translating estimates of relative risk into absolute risk for a meaningful time period                                                                                             | Not applicable |
| Other analyses           | 17  | Report other analyses done—eg analyses of subgroups and interactions, and sensitivity analyses                                                                                                               | Not applicable |
| <b>Discussion</b>        |     |                                                                                                                                                                                                              |                |
| Key results              | 18  | Summarise key results with reference to study objectives                                                                                                                                                     | 11             |
| <b>Limitations</b>       |     |                                                                                                                                                                                                              |                |
| Interpretation           | 20  | Give a cautious overall interpretation of results considering objectives, limitations, multiplicity of analyses, results from similar studies, and other relevant evidence                                   | 10,11          |
| Generalisability         | 21  | Discuss the generalisability (external validity) of the study results                                                                                                                                        | 10,11          |
| <b>Other information</b> |     |                                                                                                                                                                                                              |                |
| Funding                  | 22  | Give the source of funding and the role of the funders for the present study and, if applicable, for the original study on which the present article is based                                                | 12             |

\*Give information separately for cases and controls in case-control studies and, if applicable, for exposed and unexposed groups in cohort and cross-sectional studies.

**Note:** An Explanation and Elaboration article discusses each checklist item and gives methodological background and published examples of transparent reporting. The STROBE checklist is best used in conjunction with this article (freely available on the Web sites of PLoS Medicine at <http://www.plosmedicine.org/>, Annals of Internal Medicine at <http://www.annals.org/>, and Epidemiology at <http://www.epidem.com/>). Information on the STROBE Initiative is available at [www.strobe-statement.org](http://www.strobe-statement.org).

# BMJ Open

## Protocol of a retrospective, multicenter observational study on hyperthermic intrathoracic chemotherapy in Germany

|                                 |                                                                                                                                                                                                                                                                                                                                                                                                                                                                                                   |
|---------------------------------|---------------------------------------------------------------------------------------------------------------------------------------------------------------------------------------------------------------------------------------------------------------------------------------------------------------------------------------------------------------------------------------------------------------------------------------------------------------------------------------------------|
| Journal:                        | <i>BMJ Open</i>                                                                                                                                                                                                                                                                                                                                                                                                                                                                                   |
| Manuscript ID                   | bmjopen-2020-041511.R1                                                                                                                                                                                                                                                                                                                                                                                                                                                                            |
| Article Type:                   | Protocol                                                                                                                                                                                                                                                                                                                                                                                                                                                                                          |
| Date Submitted by the Author:   | 21-Jun-2020                                                                                                                                                                                                                                                                                                                                                                                                                                                                                       |
| Complete List of Authors:       | Markowiak, Till; Universitätsklinikum Regensburg, Thoracic Surgery<br>Koller, Michael; Universitätsklinikum Regensburg, Center for Clinical Studies<br>Zeman , Florian; Universitätsklinikum Regensburg, Center for Clinical Studies<br>Huppertz, Gunnar; Universitätsklinikum Regensburg, Center for Clinical Studies<br>Hofmann, Hans-Stefan; Universitätsklinikum Regensburg, Department of Thoracic Surgery<br>Ried, Michael; Universitätsklinikum Regensburg, Department of Thoracic Surgery |
| <b>Primary Subject Heading</b>: | Surgery                                                                                                                                                                                                                                                                                                                                                                                                                                                                                           |
| Secondary Subject Heading:      | Respiratory medicine, Oncology                                                                                                                                                                                                                                                                                                                                                                                                                                                                    |
| Keywords:                       | Thoracic surgery < SURGERY, THORACIC MEDICINE, Adult oncology < ONCOLOGY                                                                                                                                                                                                                                                                                                                                                                                                                          |
|                                 |                                                                                                                                                                                                                                                                                                                                                                                                                                                                                                   |

SCHOLARONE™  
Manuscripts



I, the Submitting Author has the right to grant and does grant on behalf of all authors of the Work (as defined in the below author licence), an exclusive licence and/or a non-exclusive licence for contributions from authors who are: i) UK Crown employees; ii) where BMJ has agreed a CC-BY licence shall apply, and/or iii) in accordance with the terms applicable for US Federal Government officers or employees acting as part of their official duties; on a worldwide, perpetual, irrevocable, royalty-free basis to BMJ Publishing Group Ltd ("BMJ") its licensees and where the relevant Journal is co-owned by BMJ to the co-owners of the Journal, to publish the Work in this journal and any other BMJ products and to exploit all rights, as set out in our [licence](#).

The Submitting Author accepts and understands that any supply made under these terms is made by BMJ to the Submitting Author unless you are acting as an employee on behalf of your employer or a postgraduate student of an affiliated institution which is paying any applicable article publishing charge ("APC") for Open Access articles. Where the Submitting Author wishes to make the Work available on an Open Access basis (and intends to pay the relevant APC), the terms of reuse of such Open Access shall be governed by a Creative Commons licence – details of these licences and which [Creative Commons](#) licence will apply to this Work are set out in our licence referred to above.

Other than as permitted in any relevant BMJ Author's Self Archiving Policies, I confirm this Work has not been accepted for publication elsewhere, is not being considered for publication elsewhere and does not duplicate material already published. I confirm all authors consent to publication of this Work and authorise the granting of this licence.

1  
2  
3 **Protocol of a retrospective, multicenter observational study on hyperthermic**  
4 **intrathoracic chemotherapy in Germany**  
5  
6  
7  
8

9 Till Markowiak<sup>1</sup>, Michael Koller<sup>2</sup>, Florian Zeman<sup>2</sup>, Gunnar Huppertz<sup>2</sup>, Hans-Stefan Hofmann<sup>1</sup>,  
10 Michael Ried<sup>1</sup> for the HITOC Study Group  
11  
12  
13

14  
15  
16 <sup>1</sup> Department of Thoracic Surgery, University Hospital Regensburg, Regensburg, Germany  
17

18 <sup>2</sup> Center for Clinical Studies, University Hospital Regensburg, Regensburg, Germany  
19  
20  
21  
22  
23  
24  
25  
26  
27

28 **Words:** 2249  
29  
30  
31  
32

33 **Address for correspondence:**  
34

35 Michael Ried; Department of Thoracic Surgery, University Hospital Regensburg, Franz-Josef-  
36

37 Strauß-Allee 11, D-93053 Regensburg, Germany  
38

39 Phone: +49 941 944 9810, Fax: +49 941 944 9811  
40

41  
42 Email: [michael.ried@ukr.de](mailto:michael.ried@ukr.de)  
43  
44  
45  
46  
47  
48  
49  
50  
51  
52  
53  
54  
55  
56  
57  
58  
59  
60



**ABSTRACT**

**Introduction:** Objective of the “German HITOC-study” is to evaluate the hyperthermic intrathoracic chemotherapy (HITOC) as additional treatment after surgical cytoreduction for malignant pleural tumors. Even though HITOC is applied with increasing frequency, there is no standardized therapy protocol concerning the technique of HITOC, the selection as well as dosage of chemotherapeutic agents and perioperative management in order to provide a safe and comparable, standardized treatment regime.

**Methods and analysis:** This trial is a retrospective, multi-center observational study, which is funded by the German Research Foundation. Approximately 300 patients will be included. Four Departments of Thoracic Surgery, who are performing the most HITOC procedures in Germany, are contributing to this study: Center for Thoracic Surgery at the University Hospital Regensburg, Thoracic Clinic Heidelberg of the University of Heidelberg, Center for Thoracic Surgery of the Hospital University of Munich and the Department of Thoracic Surgery at the University Hospital Freiburg. All patients who underwent surgical cytoreduction and subsequent HITOC at one of the four centers between starting the HITOC-program in 2008 until December 2019 will be included. Information on the performed HITOC will be obtained, focusing on the technique as well as the applied perfusion solution including the chemotherapeutic agent. Furthermore, parameters of the patient’s postoperative recovery will be analyzed to determine 30-day morbidity and mortality.

**Ethics and dissemination:** The approvals by the local ethics committee of the respective clinic and the three participating clinics have been obtained. The results will be presented in conferences and published in a peer-reviewed journal.

**Registration:** German Clinical Trials Register (DRKS-ID: DRKS00015012)

**Keywords:** HITOC, hyperthermic intrathoracic chemotherapy, chemotherapy perfusion, pleural malignancy, pleural mesothelioma

## ARTICLE SUMMARY

### Strengths and limitations of this study

- The results of this retrospective, multi-center study should allow a better standardization of the HITOC-procedure including perioperative safety measures and also validate the existing clinical experience.
- In the long term it could be the basis for survival analyses and further prospective studies.
- Due to the retrospective nature of our study, the implementation of hyperthermic intrathoracic chemotherapy was not uniform, which affects the analysis of 30-day morbidity and mortality
- To the best of our knowledge, this study will represent the largest cohort of patients with surgical cytoreduction and HITOC.

### Abbreviations and acronyms

BSA = body surface area

eP/D = extended pleurectomy/decortication

EPP = extrapleural pneumonectomy

HITOC = hyperthermic intrathoracic chemotherapy

MPM = malignant pleural mesothelioma

P/D = pleurectomy/decortication

TC= thymic carcinoma

ZKS = Center for Clinical Studies of the University Medical Center Regensburg

## INTRODUCTION

Hyperthermic intrathoracic chemotherapy (HITOC) is a local, intraoperative perfusion of the thoracic cavity with a chemotherapeutic agent after surgical cytoreduction of malignant pleural tumors. The HITOC represents an additional therapeutic option in a multimodality treatment concept especially for patients with malignant pleural mesothelioma (MPM), thymic tumors with pleural spread (stage IVa) and even in highly selected patients with pleural carcinosis (1, 2). The spreading growth pattern of these malignant tumors along the pleura impairs a microscopically complete resection and small residues of the tumor often lead to local recurrence (2). With the application of the HITOC after macroscopic complete pleural tumor resection it is expected to obtain better local tumor control and thereby improve progression-free as well as overall survival (2-4). The few existing case series or single-center retrospective studies in patients with MPM and thymic tumors have shown some encouraging results in this regard (2, 5-9). However, a prospective study showing an advantage in survival does not yet exist.

A survey of the German Society for Thoracic Surgery on the application of HITOC confirmed that approximately 350 HITOC procedures have already been performed in Germany from 2008 to 2017. Most of the procedures were conducted at University Thoracic Surgery Centers in Munich, Heidelberg, Freiburg, Regensburg and Cologne (Witten-Herdecke) (10).

Although HITOC is performed routinely in some experienced Departments of Thoracic Surgery in Germany, only feasibility studies, case series, and retrospective studies with small numbers of patients have been published so far evaluating perioperative management, technique, the selection and dosage of chemotherapeutic agents and postoperative complications (1, 11, 12) (Table 1). There is no standardized procedure of HITOC concerning the administration of chemotherapeutic agents, the dosage of the drugs, duration and temperature of the perfusion as well as the perioperative management of these patients including safety measures for the personal. As a result, clinics performing HITOC follow internationally reported experiences and developed individual protocols (10). In 2019 a clinical practice guideline on HITOC within the guideline system of the Association of the Scientific Medical Societies in Germany was

1  
2  
3 published. Due to the lack of empirical data, this guideline was based on an expert consensus  
4 (so called S1-guideline). The group of experts agreed on the key aspects of applying HITOC  
5 in thoracic surgery (Table 2) (20).  
6  
7

8  
9 Before performing the HITOC, all patients underwent surgical cytoreduction of the pleural  
10 tumor. Therefore, pleurectomy/decortication (P/D), extended pleurectomy/decortication (eP/D)  
11 with partial and/or complete resection of the pericardium and/or diaphragm, or extrapleural  
12 pneumonectomy (EPP) is carried out to achieve a macroscopic complete resection whenever  
13 possible (21). The outcome of lung-saving procedures (P/D, eP/D) turned out to be equivalent  
14 to EPP with significantly less complications, so that these procedures should preferably be  
15 performed (8).  
16  
17

18 Usually HITOC and tumor resection are performed in the same session. Apical inflow and  
19 basal outflow drainages are placed in the thoracic cavity. The following perfusion can be  
20 carried out with an open (before wound closure) or closed (after wound closure) chest, while  
21 the procedure on the closed chest is more common. Its advantage is that no cytostatic agent  
22 can leak out of the thoracic cavity during circulation, which would be a safety risk for the  
23 practitioner (7, 10). The drainages are then connected to an external perfusion system. A  
24 stable circulation is established with a priming-volume and the perfusion solution is heated to  
25 a targeted temperature of 40-43°C (9, 22). The chemotherapeutic agents are added to the  
26 perfusate and the circulation is performed between 60 and 120 minutes. Subsequently, the  
27 perfusion solution is passively drained.  
28  
29

30 This retrospective, multi-center study will provide the first time opportunity to enroll a  
31 substantial number of study participants from experienced German centers regarding HITOC  
32 to validate the clinical experience of the individual centers and possibly form the basis for a  
33 standardized procedure with an adequate perioperative management in patients who  
34 underwent HITOC. In the long term, this database might be used for survival analyses with  
35 respect to the different tumor entities and may serve to design a prospective study.  
36  
37  
38  
39  
40  
41  
42  
43  
44  
45  
46  
47  
48  
49  
50  
51  
52  
53  
54  
55  
56  
57  
58  
59  
60

## METHODS AND ANALYSIS

### Study design

This is a retrospective, multi-center observational study to evaluate HITOC at university thoracic surgery clinics with the most performed operations including HITOC in Germany. The participating clinics include the Thoracic Surgery Center Regensburg (University Hospital Regensburg, Hospital Barmherzige Brüder Regensburg), the Department of Thoracic Surgery, Thoracic Clinic Heidelberg (University of Heidelberg), the Department of Thoracic Surgery, Medical Center, University of Freiburg and the Thoracic Surgery Center Munich, Hospital of the University of Munich (Ludwig-Maximilians-University, Campus Großhadern; Asklepios Lung Clinic Gauting). Estimating the number of patients of each participating clinic at the time of designing this study resulted in a total number of approximately 250-300 patients in the period between January 2008 and December 2019 who could be retrospectively included in this study. This will represent the largest cohort of patients who received HITOC compared to the recent international literature (Table 1) (9).

### Inclusion and exclusion criteria

The study will examine patients with malignant pleural tumors who received HITOC after surgical cytoreduction between beginning of the HITOC program in 2008 and the end of December 2019 at all study centers. Patients without HITOC or without surgical cytoreduction will not be included (Table 3). Informed consent is not an eligibility criterion because data will be processed in a pseudonymized manner in accordance with EU-GDPR and BayKrG.

### Study endpoints

This study aims at quality assurance and evaluation of HITOC after surgical cytoreduction at the thoracic surgical university hospitals with most experience with HITOC in Germany. For this broad assessment, a compound of endpoints was defined as shown in Table 4.

Central element of the study will be the evaluation of parameters concerning the implementation of HITOC. In particular the selection of chemotherapeutic agents by the

1  
2  
3 respective clinics will be assessed by showing which and how often certain combinations and  
4 dosages were used at leading German clinics in this field, since the approach varies  
5 internationally (Table 1). In this regard, the association of the administered cisplatin dosage  
6 with the occurrence and severity (according to the FDIGO classification) of postoperative renal  
7 insufficiency will be analyzed. Also the incidence and severity (according to the Clavien-Dindo  
8 classification) as well as the spectrum of postoperative complications after HITOC will be  
9 determined. To further evaluate the safety of the procedure, 30-day mortality will be another  
10 element of the assessment. Finally, the development of this procedure in Germany concerning  
11 the technique, perioperative management and safety over a time span of approximately eleven  
12 years will be demonstrated (Figure 1).  
13  
14  
15  
16  
17  
18  
19  
20  
21  
22  
23  
24  
25

### 26 **Documentation and data base**

27  
28 After identifying all patients who meet all criteria shown in Table 3, data will be documented in  
29 an electronic database. In this database information on the performed surgery and additional  
30 HITOC will be obtained, focusing on the technique as well as the applied perfusion solution.  
31  
32 Therefore, participating clinics will enter parameters regarding the patient characteristics (age,  
33 ECOG stage, ASA stage, tumor entity, tumor stage, date of first diagnosis), performed surgery  
34 (localization, extend of surgical cytoreduction, complications), HITOC (combination and  
35 dosage of chemotherapeutics, perfusion volume, temperature, flow rate, duration of  
36 chemotherapy perfusion, complications) and perioperative management (weaning, fluid  
37 balancing, care on the intensive care unit). Data from the postoperative period (30-day  
38 morbidity) also include complications assigned to the Clavien-Dindo classification with special  
39 respect to postoperative renal insufficiency, required surgical revisions, duration of intensive  
40 medical care, hospitalization and 30-day mortality (23). In addition, first data regarding  
41 progression-free and overall survival are warranted to be analyzed (Table 5).  
42  
43  
44  
45  
46  
47  
48  
49  
50  
51  
52  
53  
54  
55  
56  
57

### 58 **Data management**

59  
60

1  
2  
3 The Center for Clinical Studies (ZKS) of the University Medical Center Regensburg is  
4 establishing a web-based, central and uniform database, using a common Clinical Database  
5 Management System (CDMS). This system provides the capability to perform major data  
6 management activities within a consistent, auditable, integrated and EU-GDPR compliant  
7 environment. Data quality checks (regarding data ranges, validity and consistency) will be  
8 carried out regularly. In case of necessary corrections or existing data inconsistencies, a data  
9 manager will generate data queries consecutively. All data entries will be routinely recorded  
10 via audit trail, as well as data modifications and data corrections.  
11  
12  
13  
14  
15  
16  
17  
18  
19  
20  
21

### 22 **Statistical analyses**

23  
24 Subsequently, the statistical data evaluation of the study is also carried out by the ZKS of the  
25 University Hospital Regensburg.  
26

27  
28 Patient characteristics, quality assurance parameters and evaluation of HITOC after surgical  
29 cytoreduction (Table 4) will be summarized descriptively, using absolute and relative  
30 frequencies for categorical data and mean, standard deviation, median, interquartile range,  
31 minimum and maximum for metric data.  
32  
33  
34  
35

36  
37 Risk factors (e.g. HITOC parameters) for 30-day mortality, in-hospital mortality and  
38 postoperative complications will be assessed by using binary logistic regression models. With  
39 regard to all outcome measurements, reference values for optimal HITOC parameters will be  
40 provided. The level of significance will be set at 5% for all statistical tests.  
41  
42  
43  
44

45  
46 The results of this retrospective study are intended to contribute to a standardization of the  
47 perioperative procedure including safety measurements. To establish quality assurance in  
48 HITOC patients, benchmarks are to be defined on the basis of the study. The rate of lung-  
49 sparing resections as well as the rate of postoperative renal insufficiency, wound infections as  
50 well as the length of hospital stay after surgical cytoreduction including HITOC and the 30-day  
51 mortality will be determined and thus provide reference for clinics performing this combined  
52 procedure.  
53  
54  
55  
56  
57  
58  
59  
60



### **Ethics and dissemination**

The study was funded by the German Research Foundation (Deutsche Forschungsgemeinschaft – DFG; GZ: RI 2905/3-1) and will be supported for 12 months after its start in January 2020. The trial is registered in the German Register of Clinical Studies (DRKS-ID: DRKS00015012, Date of registration: 03th August 2018). The approvals by the local ethics committee of the respective clinic and the three participating clinics have been obtained (reference number University Regensburg: 18-1119-104). Each patient will be assigned an identification number for pseudonymization. The study ends regularly in December 2020 when the study parameters have been evaluated and published. The results are planned to be published in a peer-reviewed journal.

### **Patient and public involvement**

In this study, patients or the public were not involved in the design, conduct, reporting or dissemination of research.

### **DISCUSSION**

There are different approaches in the international literature regarding the implementation and perioperative management of HITOC after surgical cytoreduction (9). A common standard for the procedure of HITOC does not yet exist, so that clinics performing this procedure orientate their protocols towards a small number of studies with often few participants (Table 1).

The available single-center studies demonstrated that the rate of complications could be acceptable with an appropriate perioperative management (1, 11, 12). To perform HITOC safely and keep HITOC-specific complications low, adequate perioperative management and an interdisciplinary approach is essential, especially between surgery, anesthesia and intensive care (24).

In the published research, cisplatin is always part of the perfusion solution. However, the dose administered varies, but usually it is applied in doses lower than 175 mg/m<sup>2</sup> body surface area BSA; Table 1) (1, 10, 13, 15, 17). The application of higher doses of cisplatin seems to be

1  
2  
3 associated with better overall survival, but also might cause more complications. Our study  
4 group described that the cisplatin concentration in patient serum increases to only about 2%  
5 of the intrathoracic concentration, although if the cisplatin dosage is increased up to 150 mg/m<sup>2</sup>  
6 BSA (6, 25). As a result, much higher concentrations can be achieved locally in the tissue than  
7 with systemic administration (22). However, high intrathoracic concentrations lead to an  
8 increased incidence of postoperative complications (e.g. renal insufficiency), for which reason  
9 the maximum tolerable dose of cisplatin was identified at 225 mg/m<sup>2</sup> BSA (6). Concerning  
10 postoperative renal insufficiency, the use of protective measures such as nephroprotective  
11 agents and fluid balancing may have a preventive effect (26). First introduced by Sugarbaker  
12 et al. in HITOC, it is currently also being practiced in a few more studies (6, 26).

13  
14 The application of a second chemotherapeutic agent is also heterogeneous. The  
15 considerations of applied agents were guided by the experience in systemic therapy.  
16 Superiority over systemic cisplatin monotherapy has been demonstrated in both MPM and  
17 thymoma patients (27, 28). In some clinics, cisplatin is combined with doxorubicin, epirubicin,  
18 gemcitabine or mitomycin, whereas other clinics use cisplatin alone (5, 13, 19).

19  
20 Another factor where the protocols differ in international compare is the target temperature of  
21 the chemotherapeutic solution. During perfusion, it is constantly measured using two probes  
22 at the inflow and outflow drainage (6). It has been shown that the penetration depth of cisplatin  
23 into the tissue increases with the temperature of the intrathoracic solution. Applied  
24 temperatures of 40-43°C are described in the literature (1, 14, 16, 29). Intrapleural  
25 temperatures above 43°C are supposed with an increased risk of pulmonary edema and  
26 should therefore be avoided (30). Also, high temperatures of the perfusate lead to an increased  
27 risk of systemic hyperthermia (24). Regarding the optimal duration of perfusion only little  
28 research exists and thus varies between 60 and 120 minutes (15, 19).

## 29 30 31 32 33 34 35 36 37 38 39 40 41 42 43 44 45 46 47 48 49 50 51 52 53 54 55 56 **Conclusion**

57 In summary, the German HITOC-Study will include the biggest study population with surgical  
58 cytoreduction and HITOC since now. It will retrospectively evaluate the additional HITOC-  
59  
60

1  
2  
3 procedure with main respect to quality assurance and it will support a standardization of the  
4  
5 procedure. Results are expected in 2021.  
6  
7  
8

9  
10 **Trial status:**

11 At the time of manuscript submission, data base is finished and data collection started in April  
12  
13 2020. The following analyses are planned to be completed by the end of 2020.  
14  
15

16  
17  
18 **Declarations**

19  
20 Author contributions: TM and MR wrote the manuscript. FZ, GH and MK proved the manuscript  
21  
22 regarding the study design and the described statistical analysis. HSH and all collaborators of  
23  
24 the HITOC Study Group revised the manuscript critically. All authors approved the final version  
25  
26 of the manuscript.  
27  
28

29  
30 HITOC Study Group: Till Markowiak<sup>1</sup>, Michael Koller<sup>2</sup>, Florian Zeman<sup>2</sup>, Gunnar Huppertz<sup>2</sup>,  
31  
32 Hans-Stefan Hofmann<sup>1</sup>, Michael Ried<sup>1</sup>, Hauke Winter<sup>3</sup>, Martin Eichhorn<sup>3</sup>, Laura Klotz<sup>3</sup>, Rudolf  
33  
34 Hatz<sup>4</sup>, Julia Zimmermann<sup>4</sup>, Julia Kovacs<sup>4</sup>, Bernward Passlick<sup>5</sup>, Severin Schmid<sup>5</sup>, Mohamed  
35  
36 Hassan<sup>5</sup>  
37  
38

39  
40  
41 <sup>1</sup> Department of Thoracic Surgery, University Hospital Regensburg, Regensburg, Germany

42  
43 <sup>2</sup> Center for Clinical Studies, University Hospital Regensburg, Regensburg, Germany

44  
45 <sup>3</sup> Thoracic Clinic Heidelberg of the University of Heidelberg, Heidelberg, Germany

46  
47 <sup>4</sup> Center for Thoracic Surgery of the Hospital University of Munich, Ludwig-Maximilians-  
48  
49 University, Campus Großhadern; Asklepios Lung Clinic Gauting, Munich, Germany

50  
51 <sup>5</sup> Department of Thoracic Surgery, University Hospital Freiburg, Freiburg, Germany  
52  
53

54  
55 Funding statement: This work was supported by the German Research Foundation,  
56  
57 Kennedyallee 40, 53170, Bonn, Germany [Grant number GZ: RI 2905/3-1].  
58  
59  
60

1  
2  
3 Competing interests: Nothing to declare.  
4

5 **FIGURE LEGENDS**  
6

7 **Figure 1:** Flow-chart of the study design  
8  
9  
10  
11  
12  
13  
14  
15  
16  
17  
18  
19  
20  
21  
22  
23  
24  
25  
26  
27  
28  
29  
30  
31  
32  
33  
34  
35  
36  
37  
38  
39  
40  
41  
42  
43  
44  
45  
46  
47  
48  
49  
50  
51  
52  
53  
54  
55  
56  
57  
58  
59  
60

For peer review only

## TABLES

**Table 1:** Study overview

| Author, year<br>(reference number) | Patients<br>(primary tumors)   | Chemotherapeutic agents, duration,<br>temperature                                                              |
|------------------------------------|--------------------------------|----------------------------------------------------------------------------------------------------------------|
| Refaely et al., 2001 (13)          | n=15<br>(thymoma/TC)           | cisplatin (100mg/m <sup>2</sup> BSA); 60 min; 42°C                                                             |
| De Bree et al., 2002 (5)           | n=3 (thymoma/TC)<br>n=11 (MPM) | cisplatin (80mg/m <sup>2</sup> BSA) + doxorubicin<br>(15-30mg/m <sup>2</sup> BSA); 90 min; 40-41°C             |
| Richards et al., 2006 (6)          | n=44 (MPM)                     | cisplatin (low-dose: 50-150mg/m <sup>2</sup> BSA;<br>high-dose: 175-250mg/m <sup>2</sup> BSA); 60 min;<br>42°C |
| Zellos et al., 2009 (11)           | n=29 (MPM)                     | cisplatin (75-200mg/m <sup>2</sup> BSA); 60 min;<br>42°C                                                       |
| Tillemann et al., 2009 (12)        | n=92 (MPM)                     | cisplatin (225mg/m <sup>2</sup> BSA); 60 min; 42°C                                                             |
| Ried et al., 2013 (2)              | n=8 (MPM)<br>n=8 (thymoma/TC)  | cisplatin (100-150mg/m <sup>2</sup> BSA); 60 min;<br>42°C                                                      |
| Sugarbaker et al., 2013 (1)        | n=72 (MPM)                     | cisplatin (175-225mg/m <sup>2</sup> BSA); 60 min;<br>42°C                                                      |
| Yellin et al., 2013 (14)           | n=35<br>(thymoma/TC)           | cisplatin (100mg/m <sup>2</sup> BSA) + doxorubicin<br>(50-60mg, 60 min; 43°C                                   |
| Yu et al.; 2013 (15)               | n=4 (thymoma/TC)               | cisplatin (100mg/m <sup>2</sup> BSA); 120 min; 41-<br>43°C                                                     |
| Migliore et al., 2015 (4)          | n=6 (MPM)<br>n=2 (lung cancer) | cisplatin (120mg/m <sup>2</sup> BSA); 60 min;<br>42.5°C                                                        |
| Ishibashi et al., 2015 (16)        | n=14 (MPM)                     | cisplatin (80mg/m <sup>2</sup> BSA); 60 min; 42°C                                                              |
| Ambrogi et al., 2016 (17)          | n=13<br>(thymoma/TC)           | cisplatin (80mg/m <sup>2</sup> BSA) + doxorubicin<br>(25mg/m <sup>2</sup> BSA); 60 min; 42.5°C                 |
| Bertoglio et al., 2017 (18)        | n=26 (MPM)                     | cisplatin (80mg/m <sup>2</sup> BSA) + doxorubicin<br>(25mg/m <sup>2</sup> BSA); 60 min; 42.5°C                 |
| Maury et al., 2017 (19)            | n=19<br>(thymoma/TC)           | cisplatin (50mg/m <sup>2</sup> BSA) + mitomycin<br>(25mg/m <sup>2</sup> BSA); 90 min; 42°C                     |
| Ambrogi et al., 2018 (8)           | n=49 (MPM)                     | cisplatin (80mg/m <sup>2</sup> BSA) + epirubicin<br>(25mg/m <sup>2</sup> BSA); 60 min; 42.5°C                  |
| Burt et al., 2018 (7)              | n=104 (MPM)                    | cisplatin (175-225mg/m <sup>2</sup> BSA) +<br>gemcitabine (100-1200mg/m <sup>2</sup> BSA); 60<br>min; 40-42°C  |

|                            |                            |                      |                                                                                  |
|----------------------------|----------------------------|----------------------|----------------------------------------------------------------------------------|
| 1<br>2<br>3<br>4<br>5<br>6 | Markowiak et al., 2019 (3) | n=29<br>(thymoma/TC) | cisplatin (100-175mg/m <sup>2</sup> BSA) +<br>doxorubicin (0-65mg); 60 min; 42°C |
|----------------------------|----------------------------|----------------------|----------------------------------------------------------------------------------|

7 BSA = Body surface area, MPM = malignant pleural mesothelioma, TC= thymic carcinoma  
8  
9  
10  
11  
12  
13  
14  
15  
16  
17  
18  
19  
20  
21  
22  
23  
24  
25  
26  
27  
28  
29  
30  
31  
32  
33  
34  
35  
36  
37  
38  
39  
40  
41  
42  
43  
44  
45  
46  
47  
48  
49  
50  
51  
52  
53  
54  
55  
56  
57  
58  
59  
60

For peer review only

**Table 2:** Consensus-based expert recommendation (excerpt) (20)

| <b>Content; consensus strength</b> |                                                                                                       |
|------------------------------------|-------------------------------------------------------------------------------------------------------|
| <b>Nomenclature</b>                | – Hyperthermic intrathoracic chemotherapy (HITOC); 100%                                               |
| <b>Technique</b>                   | – One session; 100%                                                                                   |
|                                    | – Closed thorax; 100%                                                                                 |
|                                    | – Temperature of 42°C on the outflow drainage; 100%                                                   |
|                                    | – Duration of 60min; 100%                                                                             |
| <b>Chemotherapeutic agents</b>     | – Application of cisplatin; 100%                                                                      |
|                                    | – Maximum dosage of 225mg/m <sup>2</sup> BSA; 100%                                                    |
|                                    | – Dosage between 150 and 175mg/m <sup>2</sup> BSA; 100%                                               |
| <b>Perioperative management</b>    | – Perioperative fluid balancing and forced diuresis; 100%                                             |
|                                    | – Drug-based nephroprotection may be considered; 100%                                                 |
|                                    | – Safety-management including protective clothing of the personnel and disposal of drain fluids; 100% |
| <b>Indications</b>                 | – Malignant pleural mesothelioma; 100%                                                                |
|                                    | – Stage IVa thymoma; 100%                                                                             |
|                                    | – Secondary pleural carcinosis; 100%                                                                  |

BSA=Body surface area

**Table 3:** Inclusion- and exclusion criteria

| Inclusion criteria                                                                 | Exclusion criteria                                                                     |
|------------------------------------------------------------------------------------|----------------------------------------------------------------------------------------|
| <ul style="list-style-type: none"><li>• Age <math>\geq</math> 18 years</li></ul>   | <ul style="list-style-type: none"><li>• Treatment without HITOC</li></ul>              |
| <ul style="list-style-type: none"><li>• Malignant pleural tumor</li></ul>          | <ul style="list-style-type: none"><li>• HITOC without surgical cytoreduction</li></ul> |
| <ul style="list-style-type: none"><li>• Surgical cytoreduction and HITOC</li></ul> |                                                                                        |
| <ul style="list-style-type: none"><li>• Treatment period: 2008-2019</li></ul>      |                                                                                        |

HITOC=hyperthermic intrathoracic chemotherapy



**Table 4:** Study Endpoints (Quality assurance and implementation of intraoperative HITOC after surgical cytoreduction)

| Study endpoints                                                                                       |
|-------------------------------------------------------------------------------------------------------|
| • dosing of the intrathoracic chemotherapeutic agent                                                  |
| • postoperative renal failure (dependence on cisplatin dosage)                                        |
| • 30-day morbidity and mortality                                                                      |
| • development of the technique, perioperative management and complication spectrum over time of HITOC |

HITOC=hyperthermic intrathoracic chemotherapy

**Table 5:** Overview of data collection with respect to subgroups

**Subgroups of data collection**

- Demographic data
- Physical examination
- Performance status
- Tumor specific data
- Surgery specific data (intra-, postoperative)
- HITOC specific data
- Renal function
- Information on hospitalization
- Follow-up

HITOC=hyperthermic intrathoracic chemotherapy

**REFERENCES**

1. Sugarbaker DJ, Gill RR, Yeap BY, Wolf AS, DaSilva MC, Baldini EH, et al. Hyperthermic intraoperative pleural cisplatin chemotherapy extends interval to recurrence and survival among low-risk patients with malignant pleural mesothelioma undergoing surgical macroscopic complete resection. *J Thorac Cardiovasc Surg.* 2013;145(4):955-63.
2. Ried M, Potzger T, Braune N, Neu R, Zausig Y, Schalke B, et al. Cytoreductive surgery and hyperthermic intrathoracic chemotherapy perfusion for malignant pleural tumours: perioperative management and clinical experience. *Eur J Cardiothorac Surg.* 2013;43(4):801-7.
3. Markowiak T, Neu R, Ansari MKA, Grosser C, Klinkhammer-Schalke M, Hofmann HS, et al. Surgical Cytoreduction and HITOC for Thymic Malignancies with Pleural Dissemination. *Thorac Cardiovasc Surg.* 2019.
4. Migliore M, Calvo D, Criscione A, Viola C, Privitera G, Spatola C, et al. Cytoreductive surgery and hyperthermic intrapleural chemotherapy for malignant pleural diseases: preliminary experience. *Future Oncol.* 2015;11(2 Suppl):47-52.
5. de Bree E, van Ruth S, Baas P, Rutgers EJ, van Zandwijk N, Witkamp AJ, et al. Cytoreductive surgery and intraoperative hyperthermic intrathoracic chemotherapy in patients with malignant pleural mesothelioma or pleural metastases of thymoma. *Chest.* 2002;121(2):480-7.
6. Richards WG, Zellos L, Bueno R, Jaklitsch MT, Janne PA, Chirieac LR, et al. Phase I to II study of pleurectomy/decortication and intraoperative intracavitary hyperthermic cisplatin lavage for mesothelioma. *J Clin Oncol.* 2006;24(10):1561-7.
7. Burt BM, Richards WG, Lee HS, Bartel S, Dasilva MC, Gill RR, et al. A Phase I Trial of Surgical Resection and Intraoperative Hyperthermic Cisplatin and Gemcitabine for Pleural Mesothelioma. *J Thorac Oncol.* 2018;13(9):1400-9.
8. Ambrogi MC, Bertoglio P, Aprile V, Chella A, Korasidis S, Fontanini G, et al. Diaphragm and lung-preserving surgery with hyperthermic chemotherapy for malignant pleural mesothelioma: A 10-year experience. *J Thorac Cardiovasc Surg.* 2018;155(4):1857-66 e2.

- 1  
2  
3 9. Zhou H, Wu W, Tang X, Zhou J, Shen Y. Effect of hyperthermic intrathoracic  
4 chemotherapy (HITHOC) on the malignant pleural effusion: A systematic review and meta-  
5 analysis. *Medicine (Baltimore)*. 2017;96(1):e5532.  
6  
7
- 8  
9 10. Ried M, Hofmann HS, Dienemann H, Eichhorn M. [Implementation of Hyperthermic  
10 Intrathoracic Chemotherapy (HITHOC) in Germany]. *Zentralbl Chir*. 2018.  
11  
12
- 13 11. Zellos L, Richards WG, Capalbo L, Jaklitsch MT, Chirieac LR, Johnson BE, et al. A  
14 phase I study of extrapleural pneumonectomy and intracavitary intraoperative hyperthermic  
15 cisplatin with amifostine cytoprotection for malignant pleural mesothelioma. *J Thorac*  
16 *Cardiovasc Surg*. 2009;137(2):453-8.  
17  
18
- 19 12. Tilleman TR, Richards WG, Zellos L, Johnson BE, Jaklitsch MT, Mueller J, et al.  
20 Extrapleural pneumonectomy followed by intracavitary intraoperative hyperthermic cisplatin  
21 with pharmacologic cytoprotection for treatment of malignant pleural mesothelioma: a phase II  
22 prospective study. *J Thorac Cardiovasc Surg*. 2009;138(2):405-11.  
23  
24
- 25 13. Refaely Y, Simansky DA, Paley M, Gottfried M, Yellin A. Resection and perfusion  
26 thermochemotherapy: a new approach for the treatment of thymic malignancies with pleural  
27 spread. *The Annals of Thoracic Surgery*. 2001;72(2):366-70.  
28  
29
- 30 14. Yellin A, Simansky DA, Ben-Avi R, Perelman M, Zeitlin N, Refaely Y, et al. Resection  
31 and heated pleural chemoperfusion in patients with thymic epithelial malignant disease and  
32 pleural spread: a single-institution experience. *J Thorac Cardiovasc Surg*. 2013;145(1):83-7;  
33 discussion 7-9.  
34  
35
- 36 15. Yu L, Jing Y, Ma S, Li F, Zhang YF. Cytoreductive surgery combined with hyperthermic  
37 intrapleural chemotherapy to treat thymoma or thymic carcinoma with pleural dissemination.  
38 *Onco Targets Ther*. 2013;6:517-21.  
39  
40
- 41 16. Ishibashi H, Kobayashi M, Takasaki C, Okubo K. Interim results of  
42 pleurectomy/decortication and intraoperative intrapleural hyperthermic cisplatin perfusion for  
43 patients with malignant pleural mesothelioma intolerable to extrapleural pneumonectomy. *Gen*  
44 *Thorac Cardiovasc Surg*. 2015;63(7):395-400.  
45  
46  
47  
48  
49  
50  
51  
52  
53  
54  
55  
56  
57  
58  
59  
60

17. Ambrogi MC, Korasidis S, Lucchi M, Fanucchi O, Giarratana S, Melfi F, et al. Pleural recurrence of thymoma: surgical resection followed by hyperthermic intrathoracic perfusion chemotherapy. *Eur J Cardiothorac Surg*. 2016;49(1):321-6.
18. Bertoglio P, Ambrogi MC, Chella A, Aprile V, Dini P, Korasidis S, et al. Is less also better? A single-institution experience on treatment of early stage Malignant Pleural Mesothelioma. *Eur J Surg Oncol*. 2017;43(7):1365-71.
19. Maury JM, Girard N, Tabutin M, Grima R, Chalabreysse L, Pavlakovic I, et al. Intra-Thoracic Chemo-Hyperthermia for pleural recurrence of thymoma. *Lung Cancer*. 2017;108:1-6.
20. Ried M, Eichhorn M, Winter H, Grützner U, Lindner M, Hatz RA, et al. [Expert Recommendation for the Implementation of Hyperthermic Intrathoracic Chemotherapy (HITOC) in Germany]. *Zentralbl Chir*. 2020;145(01):89-98.
21. Rusch V, Baldini EH, Bueno R, De Perrot M, Flores R, Hasegawa S, et al. The role of surgical cytoreduction in the treatment of malignant pleural mesothelioma: meeting summary of the International Mesothelioma Interest Group Congress, September 11-14, 2012, Boston, Mass. *J Thorac Cardiovasc Surg*. 2013;145(4):909-10.
22. Ried M, Lehle K, Neu R, Diez C, Bednarski P, Sziklavari Z, et al. Assessment of cisplatin concentration and depth of penetration in human lung tissue after hyperthermic exposure. *Eur J Cardiothorac Surg*. 2015;47(3):563-6.
23. Dindo D, Demartines N, Clavien PA. Classification of surgical complications: a new proposal with evaluation in a cohort of 6336 patients and results of a survey. *Ann Surg*. 2004;240(2):205-13.
24. Kerscher C, Ried M, Hofmann HS, Graf BM, Zausig YA. Anaesthetic management of cytoreductive surgery followed by hyperthermic intrathoracic chemotherapy perfusion. *J Cardiothorac Surg*. 2014;9:125.
25. Ried M, Potzger T, Braune N, Diez C, Neu R, Sziklavari Z, et al. Local and systemic exposure of cisplatin during hyperthermic intrathoracic chemotherapy perfusion after

1  
2  
3 pleurectomy and decortication for treatment of pleural malignancies. *J Surg Oncol.*  
4  
5 2013;107(7):735-40.

6  
7 26. Markowiak T, Kerner N, Neu R, Potzger T, Grosser C, Zeman F, et al. Adequate  
8 nephroprotection reduces renal complications after hyperthermic intrathoracic chemotherapy.  
9  
10  
11 *J Surg Oncol.* 2019;120(7):1220-6.

12  
13 27. Ardizzoni A, Rosso R, Salvati F, Fusco V, Cinquegrana A, De Palma M, et al. Activity  
14 of doxorubicin and cisplatin combination chemotherapy in patients with diffuse malignant  
15 pleural mesothelioma. An Italian Lung Cancer Task Force (FONICAP) Phase II study. *Cancer.*  
16  
17 1991;67(12):2984-7.

18  
19 28. Schmitt J, Loehrer PJ, Sr. The role of chemotherapy in advanced thymoma. *J Thorac*  
20  
21  
22  
23  
24 *Oncol.* 2010;5(10 Suppl 4):S357-60.

25  
26 29. de Bree E, van Ruth S, Schotborgh CE, Baas P, Zoetmulder FA. Limited cardiotoxicity  
27 after extensive thoracic surgery and intraoperative hyperthermic intrathoracic chemotherapy  
28 with doxorubicin and cisplatin. *Ann Surg Oncol.* 2007;14(10):3019-26.

29  
30 30. Mustafa KY, Selig WM, Burhop KE, Minnear FL, Malik AB. Hyperthermia-induced  
31  
32  
33  
34  
35  
36  
37  
38  
39  
40  
41  
42  
43  
44  
45  
46  
47  
48  
49  
50  
51  
52  
53  
54  
55  
56  
57  
58  
59  
60  
pulmonary edema. *J Appl Physiol (1985).* 1986;60(6):1980-5.

## Identification

Patients  $\geq 18$  years with malignant pleural tumor from 01/2008-12/2019 in one of the four participating centers

Patients without HITOC or cytoreduction

Eligible Patients

## Data acquisition

HITOC-specific

- Applied agents
- Dosage
- Volume

Laboratory findings

- Serum creatinine levels
- Required dialysis

Clinical findings

- Perioperative management
- Required surgical revisions
- Weaning
- Duration of intensive medical care etc.

## Evaluation

Dosing of intrathoracic chemotherapeutic agent

Postoperative renal failure

30-day mortality

Postoperative complications

Development of the technique, perioperative management and complication spectrum over time

**STROBE 2007 (v4) Statement—Checklist of items that should be included in reports of *cohort studies***

| Section/Topic                | Item # | Recommendation                                                                                                                                                                       | Reported on page # |
|------------------------------|--------|--------------------------------------------------------------------------------------------------------------------------------------------------------------------------------------|--------------------|
| <b>Title and abstract</b>    | 1      | (a) Indicate the study's design with a commonly used term in the title or the abstract                                                                                               | 1,2                |
|                              |        | (b) Provide in the abstract an informative and balanced summary of what was done and what was found                                                                                  | 2                  |
| <b>Introduction</b>          |        |                                                                                                                                                                                      |                    |
| Background/rationale         | 2      | Explain the scientific background and rationale for the investigation being reported                                                                                                 | 5,6                |
| Objectives                   | 3      | State specific objectives, including any prespecified hypotheses                                                                                                                     | 6                  |
| <b>Methods</b>               |        |                                                                                                                                                                                      |                    |
| Study design                 | 4      | Present key elements of study design early in the paper                                                                                                                              | 7                  |
| Setting                      | 5      | Describe the setting, locations, and relevant dates, including periods of recruitment, exposure, follow-up, and data collection                                                      | 7,8                |
| Participants                 | 6      | (a) Give the eligibility criteria, and the sources and methods of selection of participants. Describe methods of follow-up                                                           | 7                  |
|                              |        | (b) For matched studies, give matching criteria and number of exposed and unexposed                                                                                                  | -                  |
| Variables                    | 7      | Clearly define all outcomes, exposures, predictors, potential confounders, and effect modifiers. Give diagnostic criteria, if applicable                                             | 7,8                |
| Data sources/<br>measurement | 8*     | For each variable of interest, give sources of data and details of methods of assessment (measurement). Describe comparability of assessment methods if there is more than one group | 8,9                |
| Bias                         | 9      | Describe any efforts to address potential sources of bias                                                                                                                            | Not applicable     |
| Study size                   | 10     | Explain how the study size was arrived at                                                                                                                                            | (7)                |
| Quantitative variables       | 11     | Explain how quantitative variables were handled in the analyses. If applicable, describe which groupings were chosen and why                                                         | 9                  |
| Statistical methods          | 12     | (a) Describe all statistical methods, including those used to control for confounding                                                                                                | 9                  |
|                              |        | (b) Describe any methods used to examine subgroups and interactions                                                                                                                  | 9                  |
|                              |        | (c) Explain how missing data were addressed                                                                                                                                          | Not applicable     |
|                              |        | (d) If applicable, explain how loss to follow-up was addressed                                                                                                                       | Not applicable     |
|                              |        | (e) Describe any sensitivity analyses                                                                                                                                                | Not applicable     |
| <b>Results</b>               |        |                                                                                                                                                                                      |                    |



|                          |     |                                                                                                                                                                                                              |                |
|--------------------------|-----|--------------------------------------------------------------------------------------------------------------------------------------------------------------------------------------------------------------|----------------|
| Participants             | 13* | (a) Report numbers of individuals at each stage of study—eg numbers potentially eligible, examined for eligibility, confirmed eligible, included in the study, completing follow-up, and analysed            | Not applicable |
|                          |     | (b) Give reasons for non-participation at each stage                                                                                                                                                         | Not applicable |
|                          |     | (c) Consider use of a flow diagram                                                                                                                                                                           | Figure 1       |
| Descriptive data         | 14* | (a) Give characteristics of study participants (eg demographic, clinical, social) and information on exposures and potential confounders                                                                     | Not applicable |
|                          |     | (b) Indicate number of participants with missing data for each variable of interest                                                                                                                          | Not applicable |
|                          |     | (c) Summarise follow-up time (eg, average and total amount)                                                                                                                                                  | Not applicable |
| Outcome data             | 15* | Report numbers of outcome events or summary measures over time                                                                                                                                               | Not applicable |
| Main results             | 16  | (a) Give unadjusted estimates and, if applicable, confounder-adjusted estimates and their precision (eg, 95% confidence interval). Make clear which confounders were adjusted for and why they were included | Not applicable |
|                          |     | (b) Report category boundaries when continuous variables were categorized                                                                                                                                    | Not applicable |
|                          |     | (c) If relevant, consider translating estimates of relative risk into absolute risk for a meaningful time period                                                                                             | Not applicable |
| Other analyses           | 17  | Report other analyses done—eg analyses of subgroups and interactions, and sensitivity analyses                                                                                                               | Not applicable |
| <b>Discussion</b>        |     |                                                                                                                                                                                                              |                |
| Key results              | 18  | Summarise key results with reference to study objectives                                                                                                                                                     | 11             |
| <b>Limitations</b>       |     |                                                                                                                                                                                                              |                |
| Interpretation           | 20  | Give a cautious overall interpretation of results considering objectives, limitations, multiplicity of analyses, results from similar studies, and other relevant evidence                                   | 10,11          |
| Generalisability         | 21  | Discuss the generalisability (external validity) of the study results                                                                                                                                        | 10,11          |
| <b>Other information</b> |     |                                                                                                                                                                                                              |                |
| Funding                  | 22  | Give the source of funding and the role of the funders for the present study and, if applicable, for the original study on which the present article is based                                                | 12             |

\*Give information separately for cases and controls in case-control studies and, if applicable, for exposed and unexposed groups in cohort and cross-sectional studies.

**Note:** An Explanation and Elaboration article discusses each checklist item and gives methodological background and published examples of transparent reporting. The STROBE checklist is best used in conjunction with this article (freely available on the Web sites of PLoS Medicine at <http://www.plosmedicine.org/>, Annals of Internal Medicine at <http://www.annals.org/>, and Epidemiology at <http://www.epidem.com/>). Information on the STROBE Initiative is available at [www.strobe-statement.org](http://www.strobe-statement.org).
