# Supplementary material for: Protocol of a retrospective, multicentre observational study on hyperthermic intrathoracic chemotherapy in Germany
Source: PubMed Central journal article supplement — BMJ Open. 2020 Jul 20;10(7):e041511. doi: 10.1136/bmjopen-2020-041511 (PMC7375498; doi:10.1136/bmjopen-2020-041511), 2020-07-20
Supplement: bmjopen-2020-041511.reviewer_comments.pdf [file bmjopen-2020-041511.reviewer_comments.pdf]

## PEER REVIEW HISTORY

BMJ Open publishes all reviews undertaken for accepted manuscripts. Reviewers are asked to complete a checklist review form (<http://bmjopen.bmj.com/site/about/resources/checklist.pdf>) and are provided with free text boxes to elaborate on their assessment. These free text comments are reproduced below.

## ARTICLE DETAILS

|                            |                                                                                                                    |
|----------------------------|--------------------------------------------------------------------------------------------------------------------|
| <b>TITLE (PROVISIONAL)</b> | Protocol of a retrospective, multicenter observational study on hyperthermic intrathoracic chemotherapy in Germany |
| <b>AUTHORS</b>             | Markowiak, Till; Koller, Michael; Zeman, Florian; Huppertz, Gunnar; Hofmann, Hans-Stefan; Ried, Michael            |

This article was not externally reviewed at BMJ Open. Protocols that have been independently assessed prior to submission to BMJ Open are usually fast-tracked to publication on the grounds that further substantial changes will not be possible. This independent assessment will usually be external, independent review for both a substantial grant award from a non-commercial or government funder and ethics approval.
